# Supplementary material
Source: PubMed Central journal article supplement (PMC4680980)

**Supplementary Figure 1** Adipose tissue content in appropriate for gestational age infants by magnetic resonance imaging

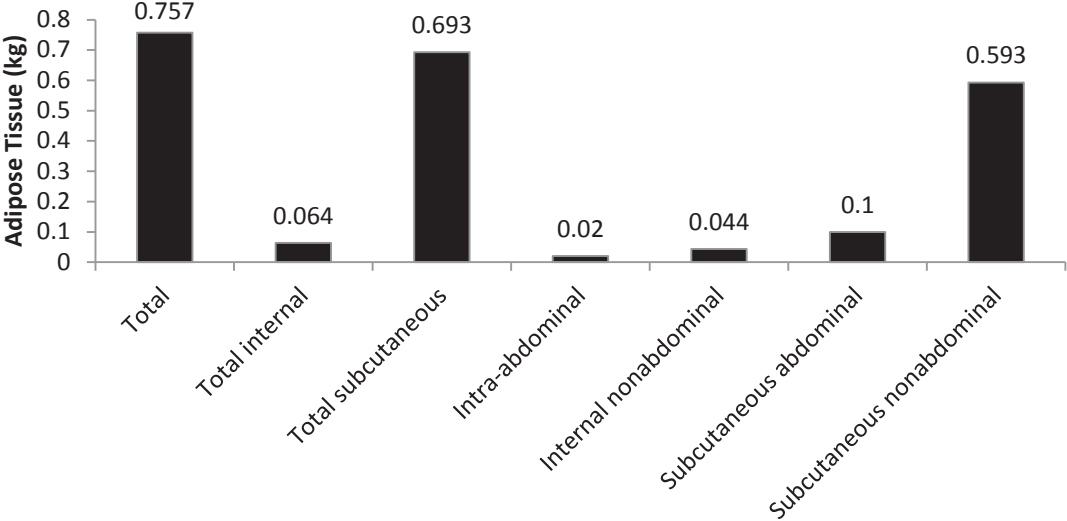

Supplement: NIHMS742193-supplement-Figure_1.pdf [file NIHMS742193-supplement-Figure_1.pdf]
