# Supplementary material
Source: PubMed Central journal article supplement (PMC4680980)

**Supplementary Figure 2** Adipose tissue volume in Indian versus White British newborns by magnetic resonance imaging\*

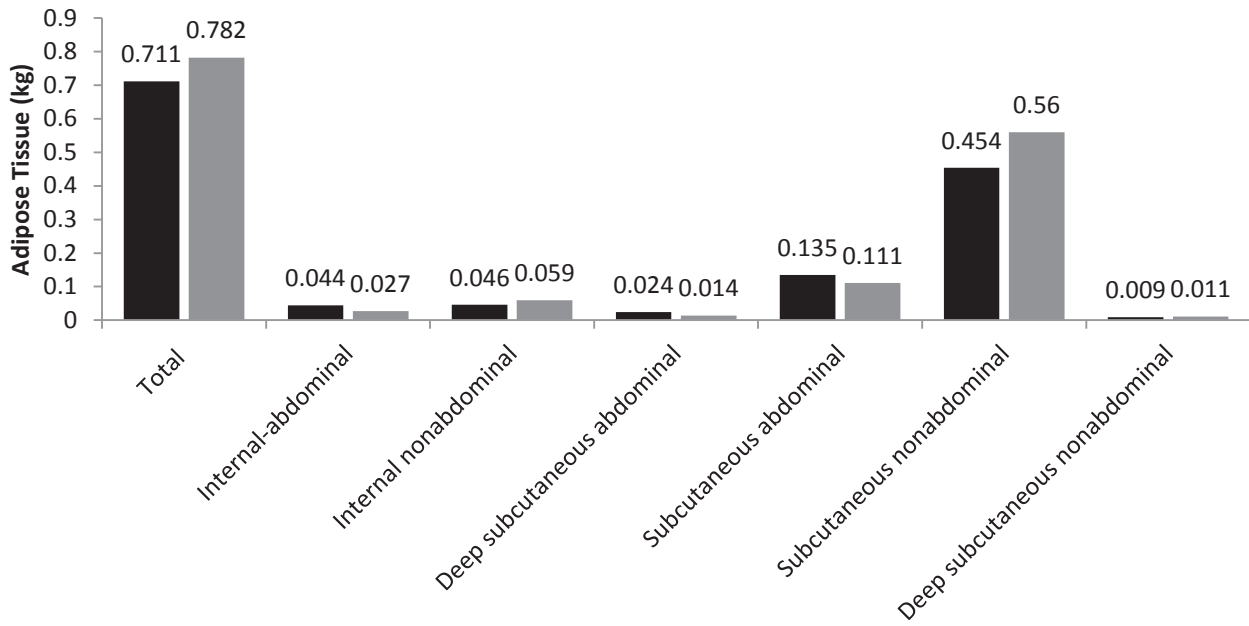

Supplement: NIHMS742193-supplement-Figure_2.pdf [file NIHMS742193-supplement-Figure_2.pdf]
